# Supplementary material for: Compositional and Functional Differences between Microbiota and Cervical Carcinogenesis as Identified by Shotgun Metagenomic Sequencing
Source: PubMed Central journal article supplement (PMC6468638; doi:10.3390/cancers11030309), 2019-03-05
Supplement: cancers-11-00309-s001.pdf [file cancers-11-00309-s001.pdf]

# Supplementary Materials: Compositional and Functional Differences between Microbiota and Cervical Carcinogenesis as Identified by Shotgun Metagenomic Sequencing

Minji Kwon, Sang-Soo Seo, Mi Kyung Kim, Dong Ock Lee and Myoung Cheol Lim

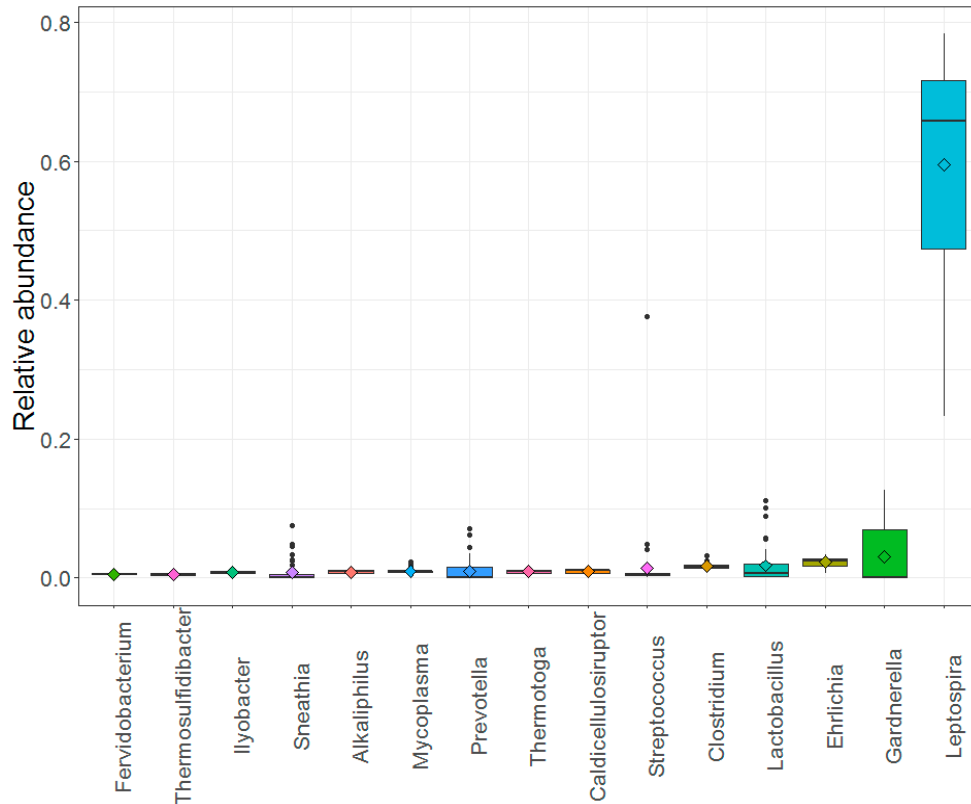

Figure S1. Box plots of relative abundances of major genera.

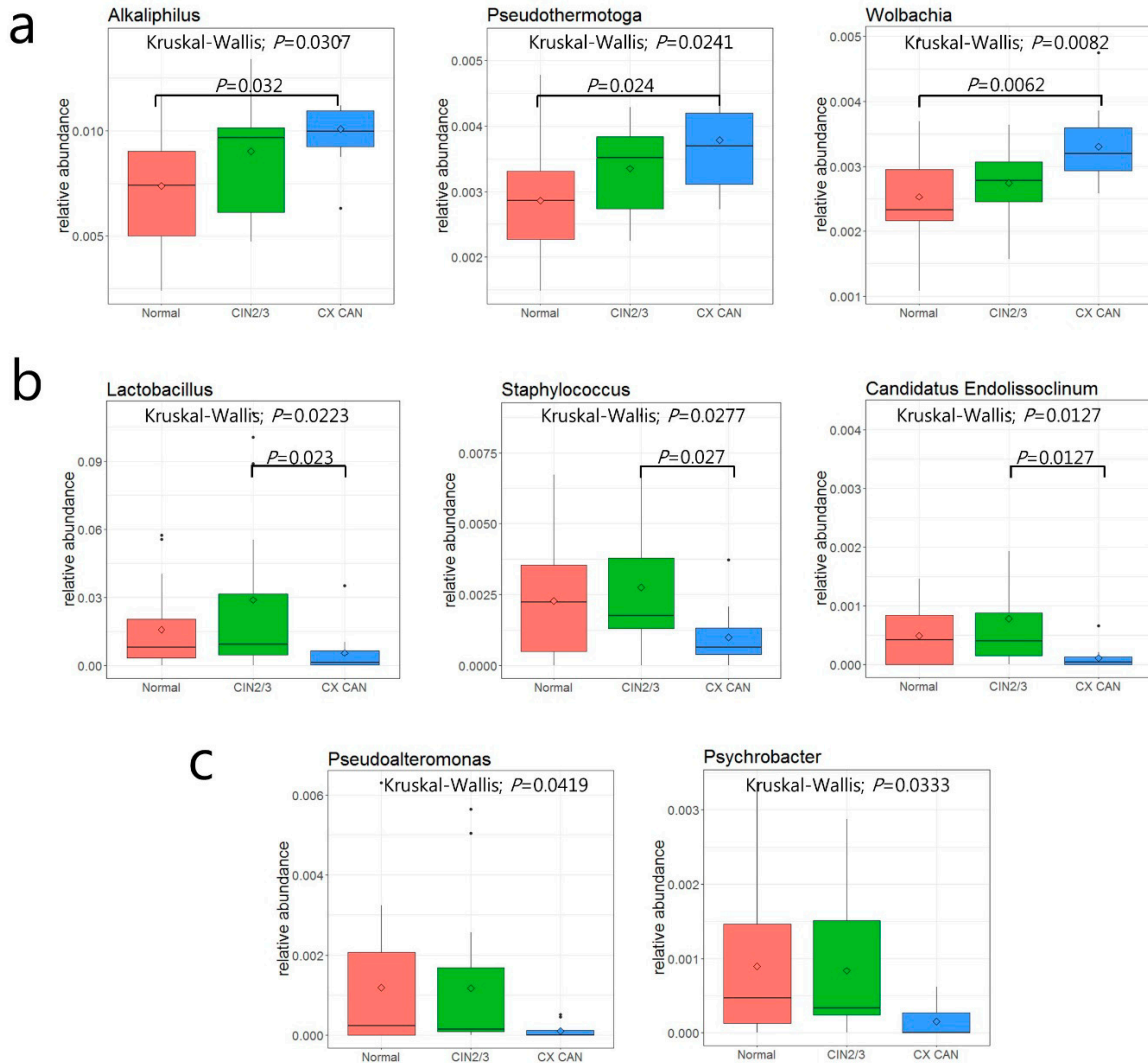

**Figure S2.** Differences among genus level. Kruskal-Wallis test was performed to test abundances of significant LEfSe-result genera among groups. (a) Cancer enriched. *Alkaliphilus* ( $p = 0.0307$ ; A-C:  $p = 0.032$ ); *Pseudothermotoga* ( $p = 0.0241$ ; A-C:  $p = 0.024$ ); *Wolbachia* ( $p = 0.0082$ ; A-C:  $p = 0.0062$ ). (b) *Lactobacillus* ( $p = 0.0223$ ; B-C:  $p = 0.023$ ); *Staphylococcus* ( $p = 0.0277$ ; B-C:  $p = 0.027$ ); *Candidatus Endolissoclinum* ( $p = 0.0127$ ; B-C:  $p = 0.011$ ). (c) Normal enriched. *Pseudoalteromonas* ( $p = 0.0419$ ; B-C:  $p = 0.056$ ); *Psychrobacter* ( $p = 0.0333$ ; A-C:  $p = 0.055$ ; B-C  $p = 0.065$ ); The post-hoc analysis used the Bonferroni method. A: Normal B: CIN2/3 C: CX CAN.

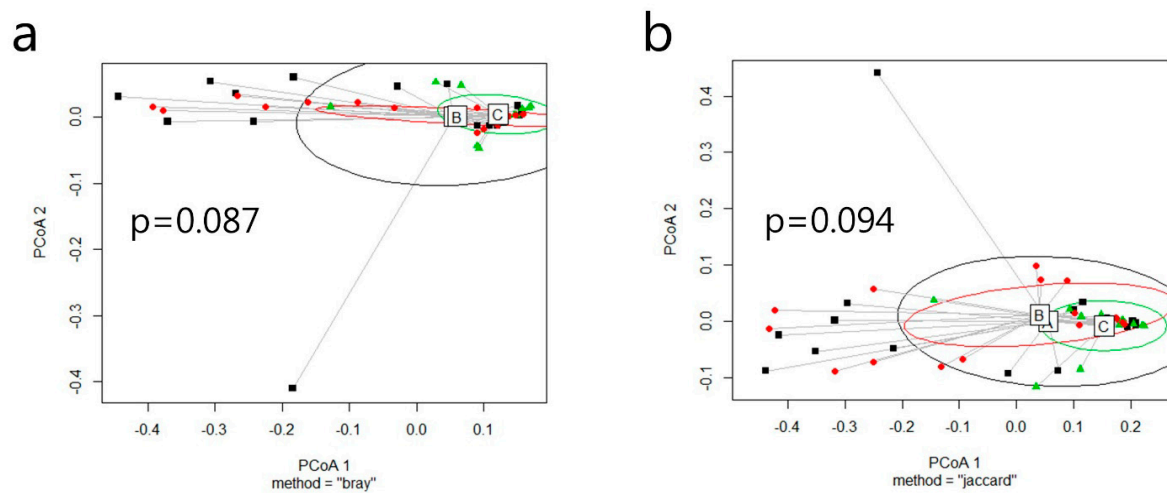

**Figure S3.** PCoA in phylum. (a) Bray-Curtis  $p = 0.087$ , (b) Jaccard  $p = 0.094$ . A: Normal, B: CIN 2/3, C: CX CAN.

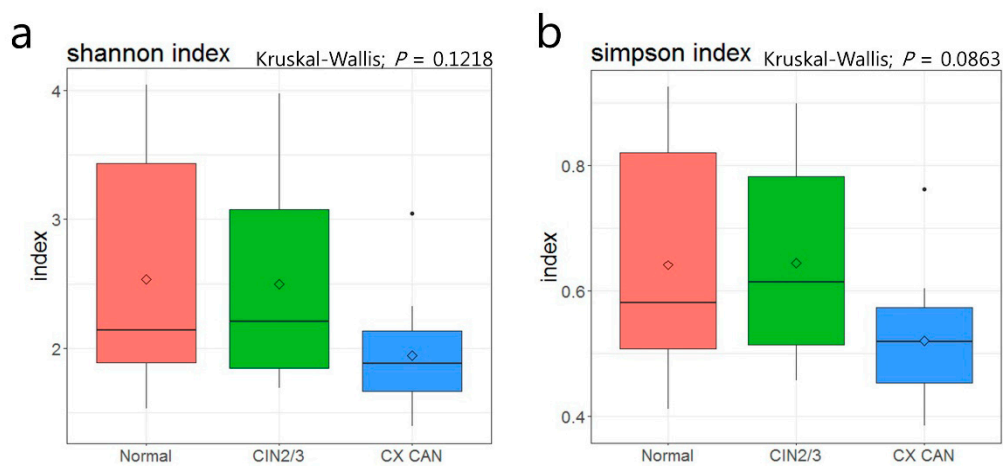

**Figure S4.** Alpha indices in genera. (a) Shannon index  $p = 0.1218$ , (b) Simpson index  $p = 0.0863$ . A: Normal, B: CIN 2/3, C: CX CAN.

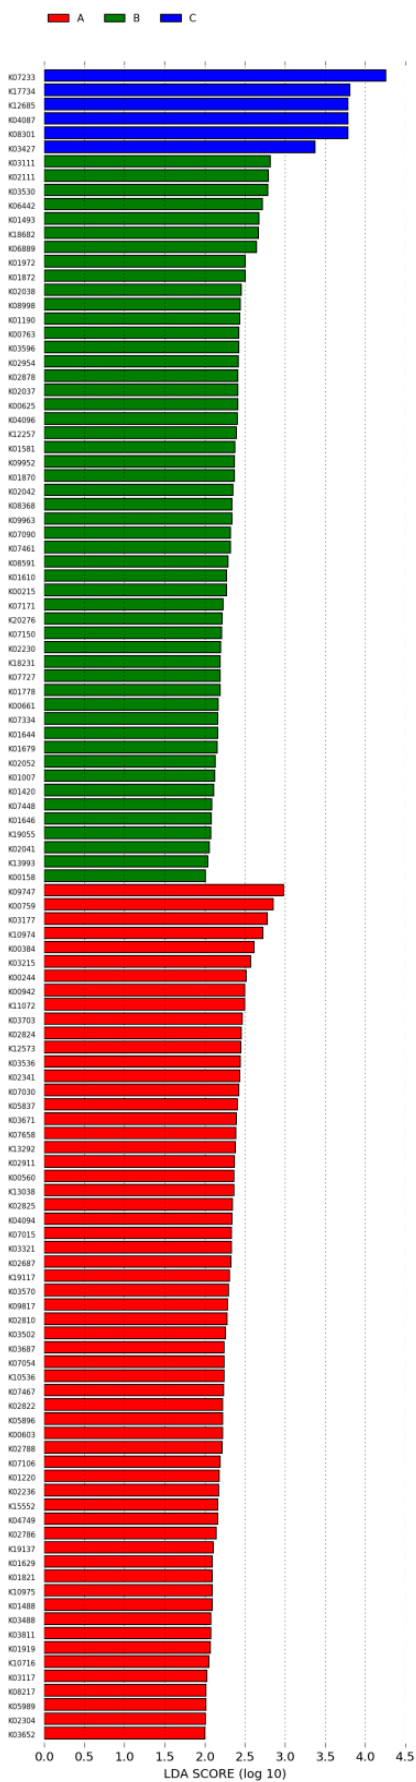

**Figure S5.** Comparison of KOs using LefSe to identify differentially abundant KEGG pathway (logarithmic LDA score > 2.00, alpha value < 0.05). A: Normal; B: CIN2/3; C: CX CAN.

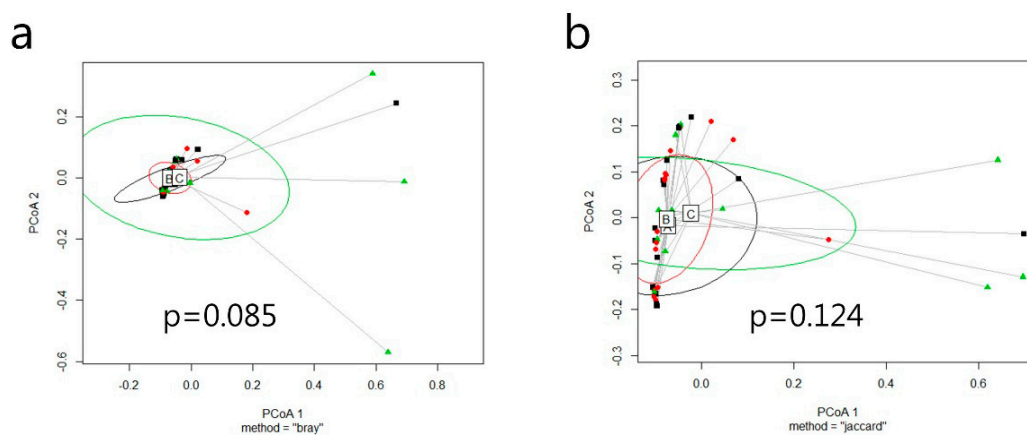

**Figure S6.** PCoA in KEGG pathway. (a) Bray-Curtis  $p = 0.085$ , (b) Jaccard  $p = 0.124$ . A: Normal, B: CIN 2/3, C: CX CAN.

**Table S1.** Mean cervical microbial abundances in 31 phyla.

| Bacteria                        | Normal  | CIN 2/3 | Cervical Cancer | $p$ Value <sup>a</sup> |
|---------------------------------|---------|---------|-----------------|------------------------|
| <i>Spirochaetes</i>             | 56.8514 | 57.8374 | 69.1847         | 0.0879                 |
| <i>Firmicutes</i>               | 13.6438 | 13.2018 | 9.0367          | 0.0253                 |
| <i>Proteobacteria</i>           | 9.5388  | 9.2061  | 6.9775          | 0.1355                 |
| <i>Actinobacteria</i>           | 4.8086  | 5.3441  | 2.3254          | 0.5233                 |
| <i>Bacteroidetes</i>            | 5.0703  | 4.2996  | 3.0699          | 0.2866                 |
| <i>Fusobacteria</i>             | 2.2548  | 1.9275  | 1.9060          | 0.6237                 |
| <i>Thermotogae</i>              | 1.8426  | 2.0249  | 2.1575          | 0.0669                 |
| <i>Tenericutes</i>              | 1.8722  | 2.0951  | 1.3798          | 0.1001                 |
| <i>Aquificae</i>                | 1.1583  | 1.1769  | 1.2629          | 0.5472                 |
| <i>Cyanobacteria</i>            | 0.8963  | 0.9024  | 0.8707          | 0.8480                 |
| <i>Verrucomicrobia</i>          | 0.3617  | 0.3550  | 0.3331          | 0.4303                 |
| <i>Chlamydiae</i>               | 0.3514  | 0.3150  | 0.3301          | 0.7656                 |
| <i>Synergistetes</i>            | 0.2046  | 0.2364  | 0.2241          | 0.3898                 |
| <i>Thermodesulfobacteria</i>    | 0.1896  | 0.1719  | 0.1786          | 0.4731                 |
| <i>Nitrospirae</i>              | 0.1668  | 0.1530  | 0.1562          | 0.7061                 |
| <i>Dictyoglomi</i>              | 0.1469  | 0.1569  | 0.1513          | 0.8622                 |
| <i>Bacteria (phylum)</i>        | 0.1401  | 0.1307  | 0.1393          | 0.4846                 |
| <i>Deinococcus.Thermus</i>      | 0.1025  | 0.0879  | 0.1150          | 0.3708                 |
| <i>Deferribacteres</i>          | 0.0865  | 0.0938  | 0.0951          | 0.7152                 |
| <i>Chlorobi</i>                 | 0.1264  | 0.0835  | 0.0166          | 0.4613                 |
| <i>Caldiserica</i>              | 0.0411  | 0.0517  | 0.0503          | 0.1126                 |
| <i>Elusimicrobia</i>            | 0.0363  | 0.0428  | 0.0161          | 0.3923                 |
| <i>Fibrobacteres</i>            | 0.0365  | 0.0343  | 0.0032          | 0.2340                 |
| <i>Ignavibacteriae</i>          | 0.0306  | 0.0290  | 0.0070          | 0.0929                 |
| <i>Chloroflexi</i>              | 0.0109  | 0.0168  | 0.0062          | 0.3351                 |
| <i>Acidobacteria</i>            | 0.0143  | 0.0119  | 0.0024          | 0.0961                 |
| <i>Planctomycetes</i>           | 0.0088  | 0.0057  | 0               | 0.0281                 |
| <i>Chrysiogenetes</i>           | 0.0040  | 0.0037  | 0.003           | 0.7979                 |
| <i>Candidatus.Cloacimonetes</i> | 0.0031  | 0.0034  | 0.0012          | 0.3365                 |
| <i>Armatimonadetes</i>          | 0.0006  | 0.0008  | 0               | 0.2764                 |
| <i>Gemmatimonadetes</i>         | 0.0002  | 0       | 0               | 0.4468                 |

<sup>a</sup>  $p$  value calculated by Kruskal-Wallis test.

**Table S2.** Mean relative abundances of COG categories.

|                                    | COG Category                                                          | Normal  | CIN2/3  | CX CAN  | p Value <sup>a</sup> |
|------------------------------------|-----------------------------------------------------------------------|---------|---------|---------|----------------------|
| Cellular Processes and Signaling   | [D] Cell-cycle control, cell division, chromosome partitioning        | 6.0426  | 6.22    | 7.6316  | 0.0248               |
|                                    | [M] Cell wall/membrane /envelope biogenesis                           | 3.1453  | 2.7111  | 1.3428  | 0.0163               |
|                                    | [N] Cell motility                                                     | 0.3279  | 0.3078  | 0.1235  | 0.0127               |
|                                    | [O] Post-translational modification, protein turnover, and chaperones | 29.4631 | 31.9494 | 42.5871 | 0.0136               |
|                                    | [T] Signal transduction mechanisms                                    | 1.8362  | 1.593   | 0.7484  | 0.0092               |
|                                    | [U] Intracellular trafficking, secretion, and vesicular transport     | 0.9884  | 0.8664  | 0.3831  | 0.0329               |
|                                    | [V] Defense mechanisms                                                | 2.0198  | 1.7914  | 0.8264  | 0.0056               |
|                                    | [W] Extracellular structures                                          | 0.3594  | 0.3025  | 0.1304  | 0.1264               |
|                                    | [Z] Cytoskeleton                                                      | 4.6924  | 4.9817  | 6.8992  | 0.0233               |
| Information Storage and Processing | [A] RNA processing and modification                                   | 0.0092  | 0.0086  | 0.0039  | 0.3361               |
|                                    | [B] Chromatin structure and dynamics                                  | 0.0100  | 0.0086  | 0.0038  | 0.2361               |
|                                    | [J] Translation, ribosomal structure and biogenesis                   | 5.6903  | 5.0348  | 2.4959  | 0.0100               |
|                                    | [K] Transcription                                                     | 2.9396  | 2.553   | 1.2190  | 0.0090               |
|                                    | [L] Replication, recombination and repair                             | 3.6321  | 3.3744  | 1.6283  | 0.0216               |
| Metabolism                         | [C] Energy production and conversion                                  | 1.5859  | 1.4063  | 0.6824  | 0.0378               |
|                                    | [E] Amino acid transport and metabolism                               | 3.4002  | 2.9632  | 1.4034  | 0.0135               |
|                                    | [F] Nucleotide transport and metabolism                               | 2.1853  | 1.9073  | 0.9373  | 0.0124               |
|                                    | [G] Carbohydrate transport and metabolism                             | 17.873  | 19.3103 | 23.6183 | 0.0124               |
|                                    | [H] Coenzyme transport and metabolism                                 | 1.8532  | 1.6196  | 0.7515  | 0.0225               |
|                                    | [I] Lipid transport and metabolism                                    | 1.3056  | 1.1586  | 0.5345  | 0.0156               |
|                                    | [P] Inorganic ion transport and metabolism                            | 2.2819  | 2.0966  | 1.0155  | 0.0200               |
|                                    | [Q] Secondary metabolite biosynthesis, transport, and catabolism      | 0.3018  | 0.2531  | 0.1200  | 0.0493               |
| Poorly Characterized               | [R] General function prediction only                                  | 4.0984  | 3.7243  | 2.3700  | 0.0111               |
|                                    | [S] Function unknown                                                  | 2.8867  | 2.7175  | 2.0507  | 0.0187               |
| Mobile Elements                    | [X] Mobilome: prophages, transposons                                  | 1.0717  | 1.1404  | 0.4930  | 0.0198               |

<sup>a</sup> p value calculated by *Kruskal-Wallis* test.

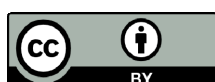

© 2019 by the authors. Licensee MDPI, Basel, Switzerland. This article is an open access article distributed under the terms and conditions of the Creative Commons Attribution (CC BY) license (<http://creativecommons.org/licenses/by/4.0/>).
